# Supplementary material for: Regioregularity effect on the self-assembly behavior of poly(3-hexylthiophene): the significance of triad sequence
Source: Royal Society of Chemistry journal article supplement (doi:10.1039/c6ra17250d), 2016-01-01
Supplement: c6ra17250d1.pdf [file c6ra17250d1.pdf]

## Supporting Information

### Regioregularity Effect on the Self-assembly Behavior of Poly(3-hexylthiophene): The Significance of Triad Sequence

Kuei-Yu Kao,<sup>a</sup> Rou-Yuan Pei,<sup>a</sup> Hsin-Lung Chen,\*<sup>a</sup> Jean-Hong Chen,<sup>b</sup> and Show-An Chen<sup>a</sup>

<sup>a</sup>Department of Chemical Engineering and Frontier Research Center on Fundamental and Applied Sciences of Matters, National Tsing Hua University, Hsin-Chu 30013, Taiwan

<sup>b</sup>Department of Materials Engineering, Kun Shan University, Tainan 71003, Taiwan

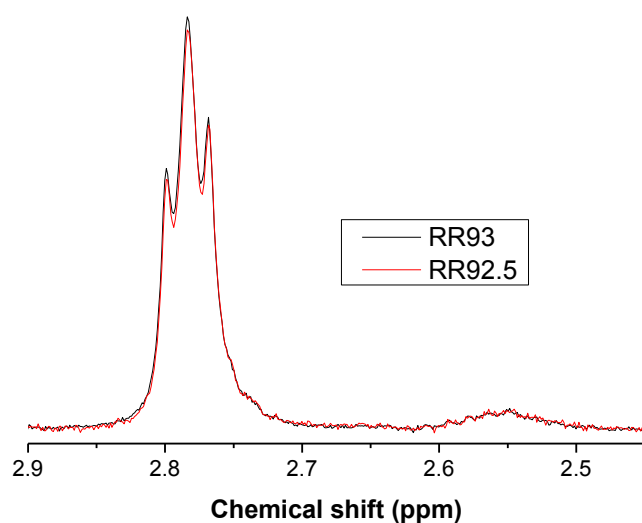

**Figure S1.** <sup>1</sup>H NMR spectra of RR92.5 (red line) and RR93 (black line) showing the resonance peaks associated with HT and HH dyads at  $\delta = 2.8$  and 2.58 ppm, respectively. The spectra of these two samples almost overlap completely with each other, indicating that their RR values are nearly identical.

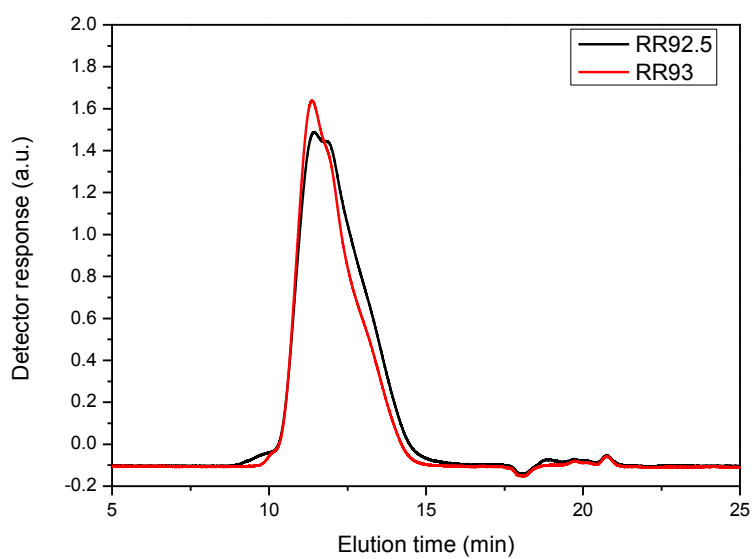

**Figure S2.** GPC elution curves of RR92.5 (black line) and RR93 (red line). The elution curves of the two samples closely resemble each other, showing that the similarity of their average molecular weight and molecular weight distribution.
